# Supplementary material for: Trait sensitivity to negative feedback determines the intensity of compulsive alcohol seeking and taking in male rats
Source: PubMed Central journal article supplement — J Psychiatry Neurosci. 2022 Jul 12;47(4):E252–62. doi: 10.1503/jpn.210220 (PMC9299933; doi:10.1503/jpn.210220), 2022-07-12
Supplement: 210220-at-1.pdf [file 210220-at-1.pdf]

| Experimental phase        |                   | N  | Variable                              | Correlation (r) | p-value |          |
|---------------------------|-------------------|----|---------------------------------------|-----------------|---------|----------|
| Two-bottle choice         | T1                | 15 | EtOH intake<br>(g EtOH/ kg b.w./ 24h) | -0.002434       | 0.9931  |          |
|                           | T2                |    |                                       | -0.03751        | 0.8944  |          |
|                           | T3                |    |                                       | -0.4645         | 0.0811  |          |
|                           | T4                |    |                                       | -0.004159       | 0.9883  |          |
|                           | T5                |    |                                       | 0.2216          | 0.4274  |          |
|                           | T6                |    |                                       | 0.009118        | 0.9743  |          |
|                           | T7                |    |                                       | -0.253          | 0.363   |          |
|                           | T8                |    |                                       | -0.2304         | 0.4088  |          |
|                           | T9                |    |                                       | 0.09377         | 0.7396  |          |
|                           | T10               |    |                                       | -0.02986        | 0.9159  |          |
|                           | T11               |    |                                       | -0.2892         | 0.2958  |          |
|                           | T12               |    |                                       | -0.09365        | 0.7399  |          |
|                           | T13               |    |                                       | 0.1937          | 0.4891  |          |
|                           | T14               |    |                                       | -0.05449        | 0.8471  |          |
|                           | T15               |    |                                       | 0.2087          | 0.4553  |          |
|                           | T16               |    |                                       | 0.1111          | 0.6933  |          |
|                           | T17               |    |                                       | 0.09762         | 0.7293  |          |
|                           | T18               |    |                                       | -0.1548         | 0.5818  |          |
| Taking criterion          |                   | 15 | Number of tests                       | 0.3277          | 0.2331  |          |
| Seeking-taking criterion  |                   | 15 | Number of tests                       | 0.1565          | 0.5775  |          |
| Seeking-taking punishment | Seeking responses | 13 | LOG Number of<br>seeking responses    | -0.3358         | 0.2619  |          |
|                           |                   |    |                                       | 0.20 mA         | 0.3802  | 0.2      |
|                           |                   |    |                                       | 0.30 mA         | -0.5502 | # 0.0514 |
|                           |                   |    |                                       | 0.30 mA         | -0.6576 | * 0.0146 |
|                           |                   |    |                                       | 0.40 mA         | -0.2439 | 0.422    |
|                           |                   |    |                                       | 0.40 mA         | -0.3869 | 0.1915   |
|                           |                   |    |                                       | 0.50 mA         | -0.6701 | * 0.0122 |
|                           |                   |    |                                       | 0.50 mA         | -0.7043 | * 0.0072 |

**Appendix 1** to Cieslik A, Noworyta K, Rygula R. Trait sensitivity to negative feedback determines the intensity of compulsive alcohol seeking and taking in male rats. *J Psychiatry Neurosci* 2022. doi: 10.1503/jpn.210220 Copyright © 2022 The Author(s) or their employer(s). To receive this resource in an accessible format, please contact us at cmajgroup@cmaj.ca. Online appendices are unedited and posted as supplied by the authors.

|                         |        |         |    |                 |          |          |
|-------------------------|--------|---------|----|-----------------|----------|----------|
|                         | Trials | 0.10 mA |    |                 | -0.1111  | 0.7179   |
|                         |        | 0.20 mA |    |                 | 0.4516   | 0.1213   |
|                         |        | 0.30 mA |    |                 | -0.3547  | 0.2343   |
|                         |        | 0.30 mA |    |                 | -0.5175  | 0.0701   |
|                         |        | 0.40 mA |    |                 | 0.1892   | 0.5358   |
|                         |        | 0.40 mA |    |                 | -0.03833 | 0.9011   |
|                         |        | 0.50 mA |    |                 | -0.4711  | 0.1041   |
|                         |        | 0.50 mA |    |                 | -0.4794  | 0.0974   |
| Extinction criterion    |        |         | 15 | Number of tests | -0.4878  | # 0.0651 |
| Reinstatement criterion |        |         | 12 | Number of tests | -0.4811  | 0.1133   |

**Table S1.) Correlation between the NF sensitivity and measured variables of alcohol seeking and taking.** NF sensitivity, expressed as the average probabilistic lose-shift ratio was correlated with investigated measures of alcohol-seeking and taking in rats. \* indicates a significant ( $p < 0.05$ ) correlation between NF sensitivity and variable of interest. # indicates a trend toward a statistically significant correlation between NF sensitivity and the given variable of interest.
